# Supplementary material for: Clinical Impact of Single Nucleotide Polymorphism in PD-L1 on Response to Nivolumab for Advanced Non-Small-Cell Lung Cancer Patients
Source: PubMed Central journal article supplement (PMC5362817; doi:10.1038/srep45124), 2017-03-23
Supplement: srep45124-s1.pdf [file srep45124-s1.pdf]

1 Clinical Impact of Single Nucleotide Polymorphism in PD-L1 on Response to Nivolumab  
2 for Advanced Non-Small-Cell Lung Cancer Patients

3

4 Takashi Nomizo, Hiroaki Ozasa\*, Takahiro Tsuji, Tomoko Funazo, Yuto Yasuda, Hironori  
5 Yoshida, Yoshitaka Yagi, Yuichi Sakamori, Hiroki Nagai, Toyohiro Hirai, Young Hak  
6 Kim,

7 Department of Respiratory Medicine, Graduate School of Medicine, Kyoto University

8 Corresponding author: [ozahiro@kuhp.kyoto-u.ac.jp](mailto:ozahiro@kuhp.kyoto-u.ac.jp)

9

10

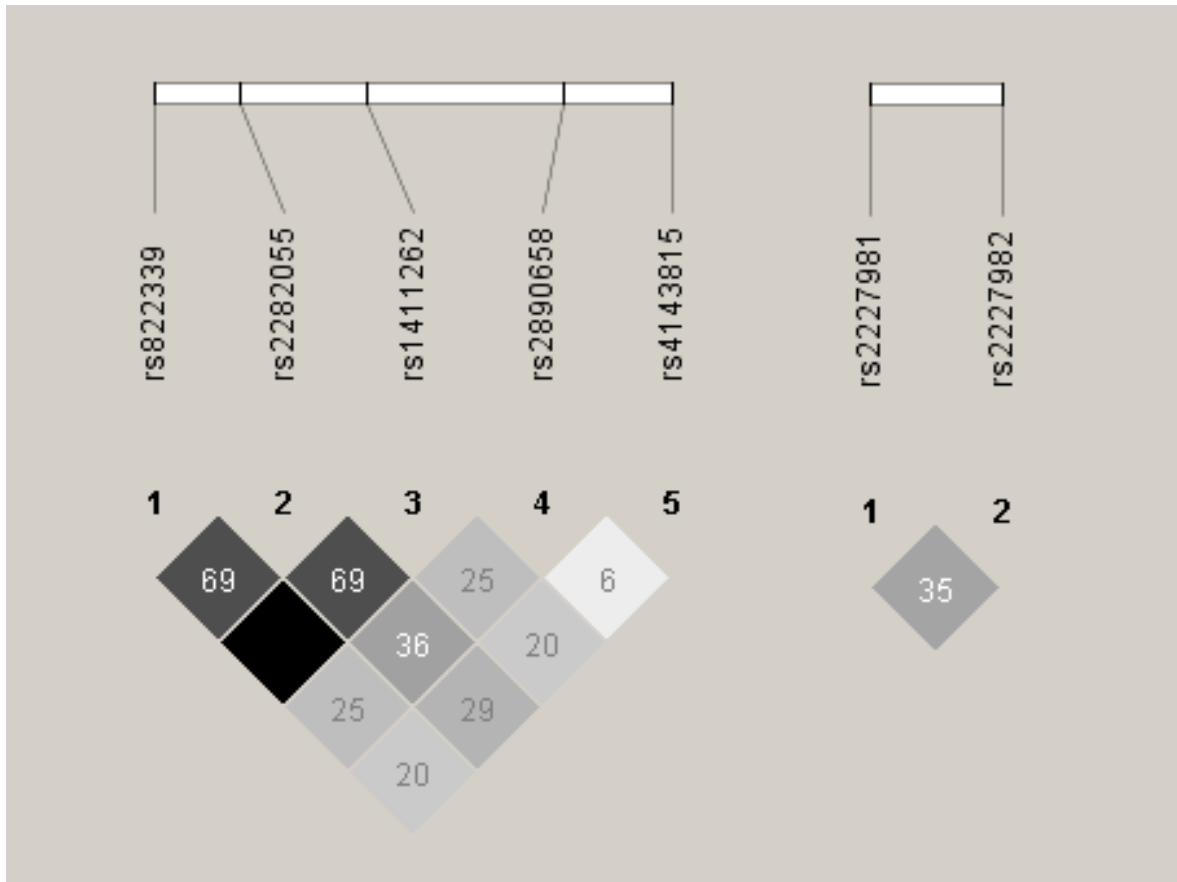

1

2 Supplementary Fig.S1.

3 Linkage disequilibrium (LD) pattern of the PD-L1 and PD-1 SNPs in this study population.

4 Each number in the squares indicates the  $r^2$  index of the LD between the correspondent

5 SNPs.
